# Supplementary material for: Atomically dispersed cobalt–nitrogen–carbon catalysts for efficient oxidative esterification of aromatic alcohols
Source: Royal Society of Chemistry journal article supplement (doi:10.1039/d3nj02558f), 2023-01-01
Supplement: d3nj02558f1.pdf [file d3nj02558f1.pdf]

# **Atomically Dispersed Cobalt-Nitrogen-Carbon Catalyst for Efficient Oxidative Esterification of Aromatic Alcohols**

Fengwei Zhang<sup>+a\*</sup>, Peihao Liu<sup>+a</sup>, Jingjing Li<sup>a</sup>, Hefang Guo<sup>a</sup>, Han Zhang<sup>a</sup>, Zehui Zhang<sup>c\*</sup> and Zhengping Dong<sup>b\*</sup>

<sup>a</sup> Institute of crystalline materials, Institute of molecular science, Shanxi University, Taiyuan 030006 (P. R. China)

<sup>b</sup> College of chemistry and chemical engineering, Lanzhou University, Lanzhou, 730000 (P. R. China)

<sup>c</sup> Key Laboratory of Catalysis and Materials Sciences of the Ministry of Education, South-Central University for Nationalities, Wuhan, 430074, P. R. China.

E-mail: zhangzehui@mail.scuec.edu.cn

**Figure S1.** TEM image of  $\text{Co}_{0.9}\text{Cu}_{0.1}@NG-800-50$

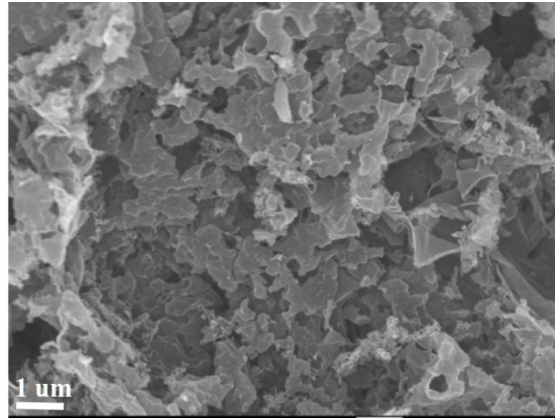

**Figure S2.** SEM image of Co SACs@NG-800-50

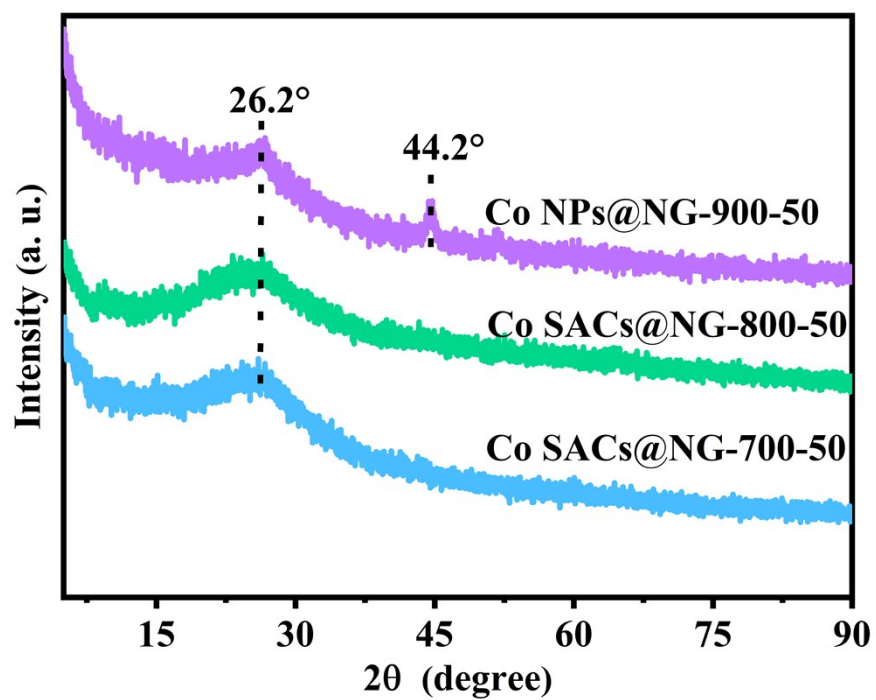

Figure S3. XRD patterns of samples prepared at different pyrolysis temperature

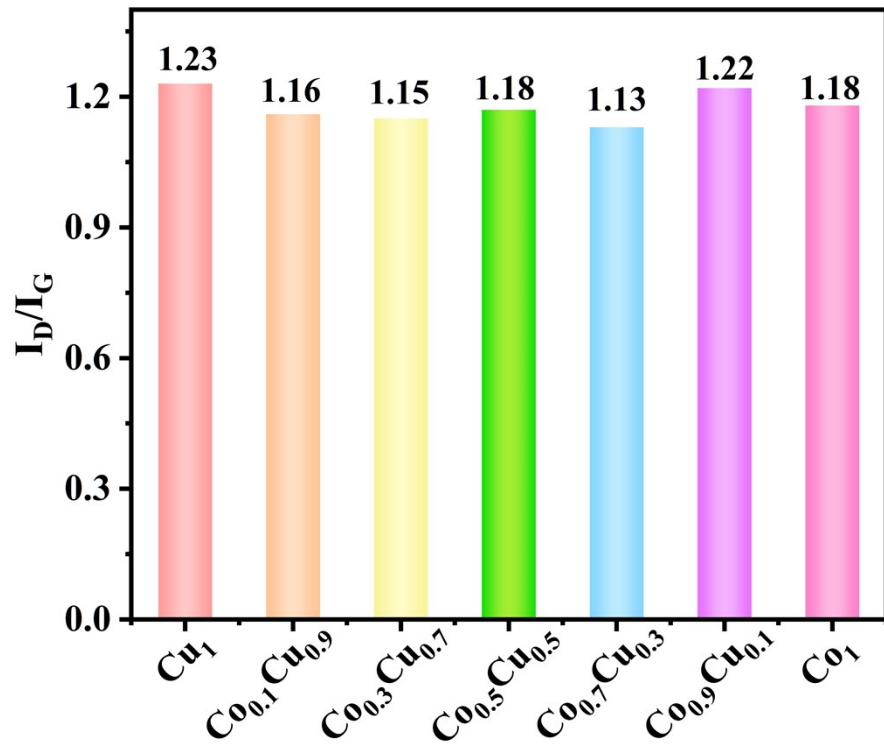

**Figure S4.** The  $I_D/I_G$  ratio of the samples with different Cu loading amount

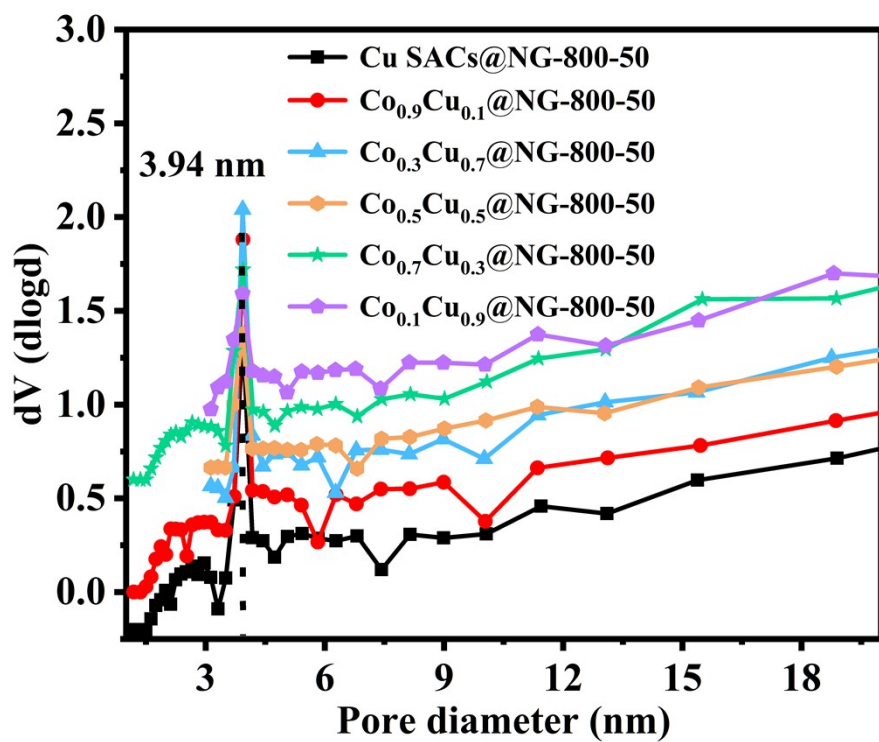

Figure S5. The pore size distribution curves of the samples with different Cu loading

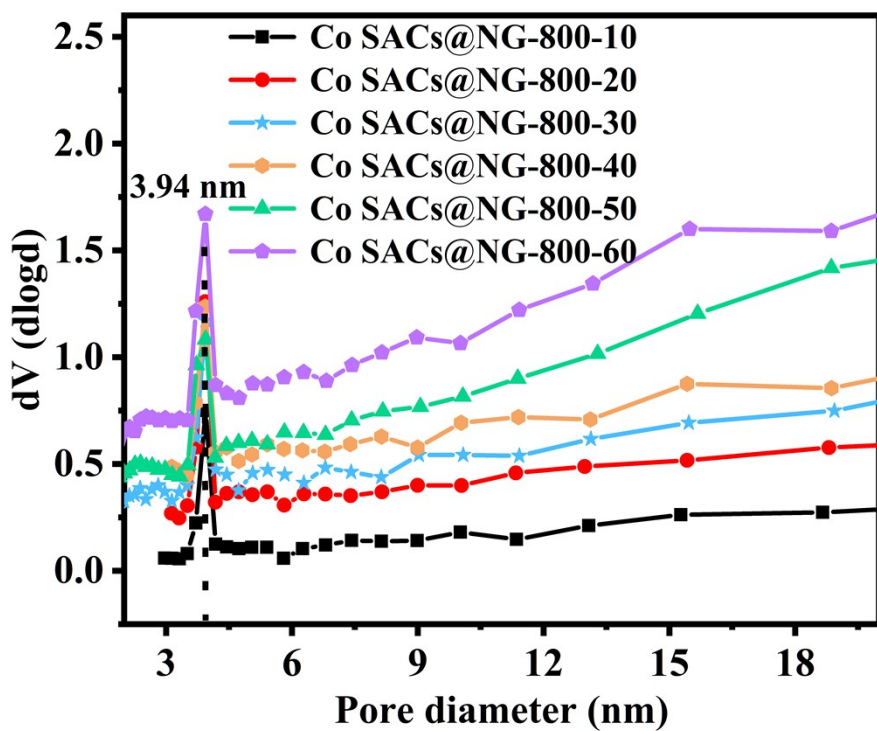

**Figure S6.** The pore size distribution curves of Co SACs@NG-800-n (n=10, 20, 30, 40, 50, and 60) catalysts

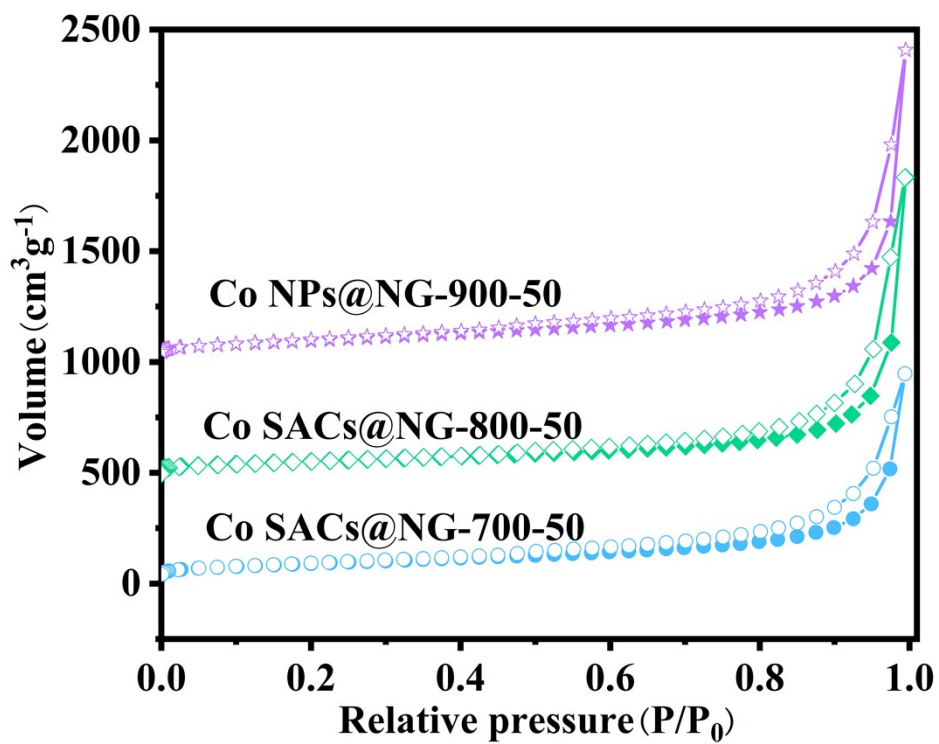

**Figure S7.** N<sub>2</sub> adsorption-desorption isotherms of Co SACs@NG-T-50 (T = 700 and 800) and Co NPs@NG-900-50 catalysts



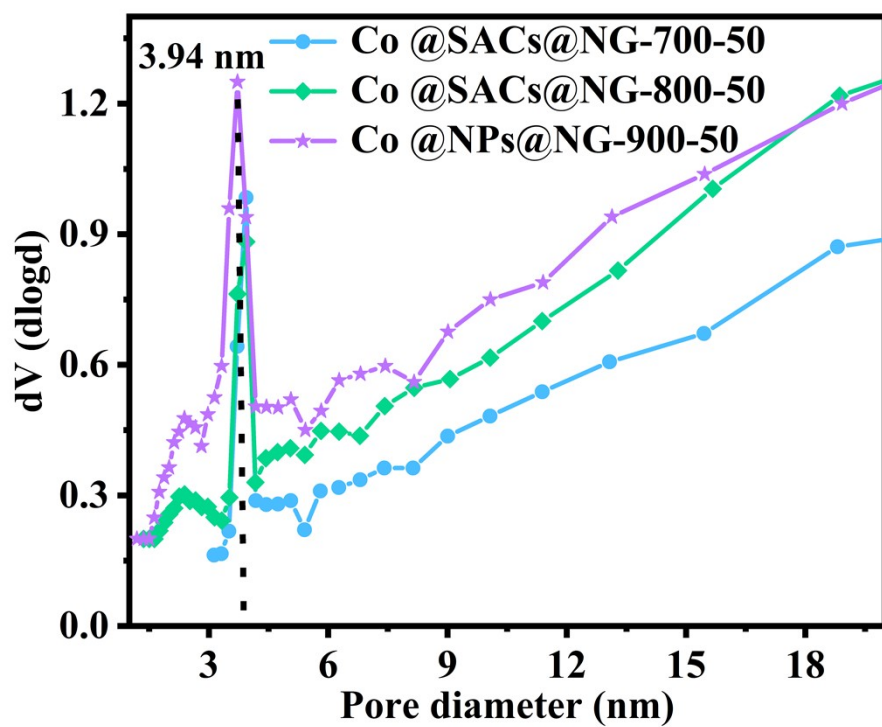

**Figure S8.** The pore size distribution curves of Co SACs@NG-T-50 (T = 700 and 800) and Co NPs@NG-900-50 catalysts

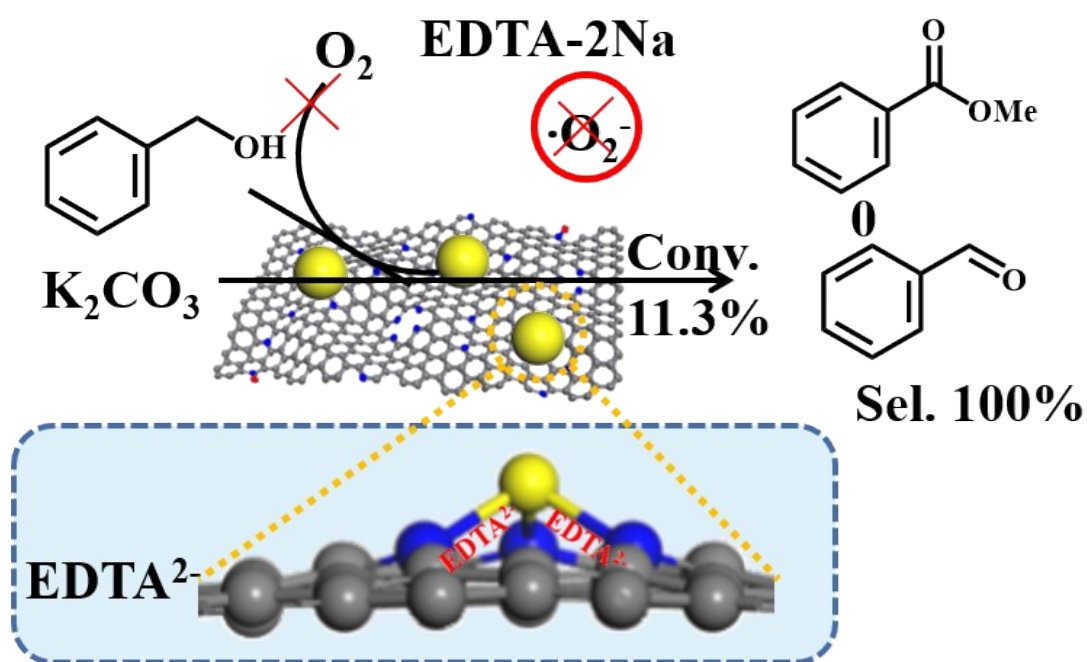

Figure S9. Control experiments of addition of EDTA-2Na poisoning agent.

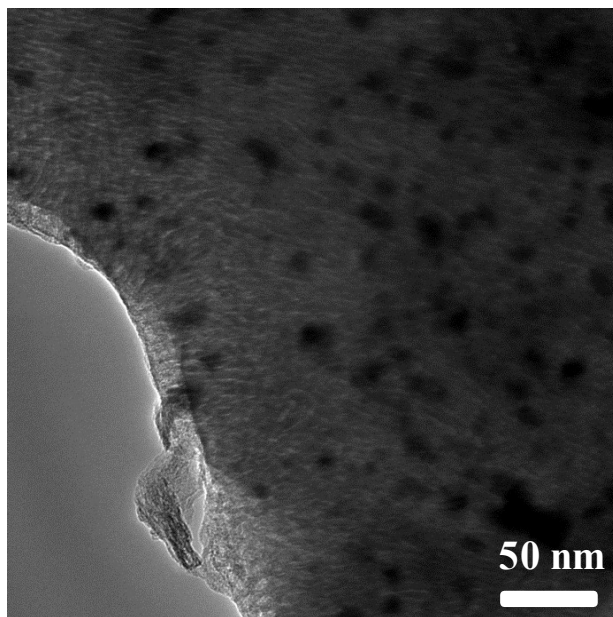

**Figure S10.** TEM image of the CoPc-800 catalyst.

**Table S1** The results of N<sub>2</sub> adsorption-desorption for different samples.

| Sample                                         | S <sub>BET</sub> (m <sup>2</sup> ·g <sup>-1</sup> ) <sup>a</sup> | V <sub>total</sub> (cm <sup>3</sup> ·g <sup>-1</sup> ) <sup>b</sup> | $\bar{D}$ (nm) <sup>c</sup> |
|------------------------------------------------|------------------------------------------------------------------|---------------------------------------------------------------------|-----------------------------|
| Cu SACs@NG-800-50                              | 336                                                              | 1.541                                                               | 3.94                        |
| Co <sub>0.1</sub> Cu <sub>0.9</sub> @NG-800-50 | 358                                                              | 1.611                                                               | 3.94                        |
| Co <sub>0.3</sub> Cu <sub>0.7</sub> @NG-800-50 | 383                                                              | 1.584                                                               | 3.93                        |
| Co <sub>0.5</sub> Cu <sub>0.5</sub> @NG-800-50 | 309                                                              | 1.210                                                               | 3.93                        |
| Co <sub>0.7</sub> Cu <sub>0.3</sub> @NG-800-50 | 344                                                              | 1.753                                                               | 3.94                        |
| Co <sub>0.9</sub> Cu <sub>0.1</sub> @NG-800-50 | 302                                                              | 1.119                                                               | 3.93                        |
| Co SACs@NG-700-50                              | 321                                                              | 1.119                                                               | 3.94                        |
| Co SACs@NG-800-50                              | 332                                                              | 1.760                                                               | 3.94                        |
| Co NPs@NG-900-50                               | 356                                                              | 1.542                                                               | 3.92                        |
| Co SACs@NG-800-10                              | 104                                                              | 0.401                                                               | 3.94                        |
| Co SACs@NG-800-20                              | 199                                                              | 0.729                                                               | 3.93                        |
| Co SACs@NG-800-30                              | 201                                                              | 0.862                                                               | 3.94                        |
| Co SACs@NG-800-40                              | 218                                                              | 0.876                                                               | 3.93                        |
| Co SACs@NG-800-60                              | 352                                                              | 1.875                                                               | 3.94                        |

<sup>a</sup> S<sub>BET</sub> is calculated using BET method, <sup>b</sup> V<sub>total</sub> is the single point adsorption at P/P<sub>0</sub> = 0.99,

<sup>c</sup> average pore diameter  $\bar{D}$  is calculated using BJH method.

**Table S2** Comparison of oxidative esterification performance of various catalysts.

| Entry | Catalyst                            | K <sub>2</sub> CO <sub>3</sub><br>(mol%) | P <sub>O2</sub><br>(atm) | Tim<br>e (h) | Conv.<br>(%) | Sel.<br>(%) | Ref.      |
|-------|-------------------------------------|------------------------------------------|--------------------------|--------------|--------------|-------------|-----------|
| 1     | Co SACs@NG-800-50                   | 20                                       | 1.0                      | 24           | >99          | >99         | This work |
| 2     | Co@NC-Gr7                           | 11.6                                     | 1.0                      | 12           | 88           | 96          | 1         |
| 3     | Co-MOFs-800                         | 50                                       | 5.0                      | 12           | 96           | 94          | 2         |
| 4     | Au/SiO <sub>2</sub>                 | 50                                       | 5.0                      | 24           | >99          | >99         | 3         |
| 5     | Au/pBN                              | 200                                      | 1.0                      | 7            | 91           | >99         | 4         |
| 6     | Au/HMS-Ce                           | 40                                       | 10                       | 6            | 98           | 94          | 5         |
| 7     | Co-NC(ST,0.6)                       | 20                                       | 1.0                      | 24           | 99.3         | 99.4        | 6         |
| 8     | Co@NC-2-900                         | 20                                       | 1.0                      | 24           | >99          | 98          | 7         |
| 9     | CoNC/CB                             | 18.7                                     | 20                       | 12           | 91.4         | 97.0        | 8         |
| 10    | CoO <sub>x</sub> -N@C,PANI          | 10                                       | 1.0                      | 24           | 92           | 97.8        | 9         |
| 11    | Co <sub>3</sub> O <sub>4</sub> -N@C | 20                                       | 1.0                      | 24           | >99          | 97          | 10        |

## References

- [1] T.V. Astrakova, V.I. Sobolev, K.Y. Koltunov, Facile mechanochemical synthesis of Co@NC catalysts for oxidative esterification of benzyl alcohol with methanol, *Catal. Commun.*, **2020**, *137*, 105952.
- [2] P. Mekrattanachai, L. Zhu, N. Setthaya, C. Chindawong, W.G. Song, The highly effective cobalt based metal-organic frameworks catalyst for one pot oxidative esterification under mild conditions, *Catal. Lett.*, **2022**, *152*, 1639-1650.
- [3] X. Kang, J. Zhang, W. Shang, T. Wu, P. Zhang, B. Han, Z. Wu, G. Mo, X. Xing, One-step synthesis of highly efficient nanocatalysts on the supports with hierarchical pores using porous ionic liquid-water gel, *J. Am. Chem. Soc.*, **2014**, *136*, 3768-3771.
- [4] R. Zhang, X. Yang, Z. Tao, X. Wang, H. Wang, L. Wang, B. Lv, Insight into the effective aerobic oxidative cross-esterification of alcohols over Au/porous boron nitride catalyst, *ACS Appl. Mater. & Interfaces*, **2019**, *11*, 46678-46687.
- [5] L.A. Parreira, N. Bogdanchikova, A. Pestryakov, T.A. Zepeda, I. Tuzovskaya, M.H. Farías, E.V. Gusevskaya, Nanocrystalline gold supported on Fe-, Ti- and Ce-modified hexagonal mesoporous silica as a catalyst for the aerobic oxidative esterification of benzyl alcohol, *Appl. Catal. A: General*, **2011**, *397*, 145-152.
- [6] Z. Long, X. Chen, P. Lu, S. Liu, Y. Zhang, G. Chen, M. Tong, L. Sun, W. Zhan, F. Huang, A bi-functional cobalt and nitrogen co-doped carbon catalyst for aerobic oxidative esterification of benzyl alcohol with methanol and oxygen reduction

reaction, *Catal. Lett.*, **2019**, *149*, 3160-3168.

[7] Q. Zhu, F. Wang, F. Zhang, Z. Dong, Renewable chitosan-derived cobalt@N-doped porous carbon for efficient aerobic esterification of alcohols under air, *Nanoscale*, **2019**, *11*, 17736-17745.

[8] T. Cheng, H. Yu, F. Peng, H. Wang, B. Zhang, D. Su, Identifying active sites of CoNC/CNT from pyrolysis of molecularly defined complexes for oxidative esterification and hydrogenation reactions, *Catal. Sci. & Technol.*, **2016**, *6*, 1007-1015.

[9] V. Panwar, S.S. Ray, S.L. Jain, Highly efficient (CoO<sub>x</sub>-N@C, PANI) nanopowder derived from pyrolysis of polyaniline grafted cobalt acetate for oxidative methyl esterification of benzyl alcohols, *Mol. Catal.*, **2017**, *427*, 31-38.

[10] R.V. Jagadeesh, H. Junge, M.-M. Pohl, J. Radnik, A. Brückner, M. Beller, Selective oxidation of alcohols to esters using heterogeneous Co<sub>3</sub>O<sub>4</sub>-N@C catalysts under mild conditions, *J. Am. Chem. Soc.*, **2013**, *135*, 10776-10782.
